# Supplementary material
Source: PubMed Central journal article supplement (PMC6206878)
Supplement: NIHMS1502256-supplement-Supplemental_Digital_Content.pdf [file NIHMS1502256-supplement-Supplemental_Digital_Content.pdf]

## ONLINE SUPPLEMENT

### Extracellular Ubiquitin(1-76) and Ubiquitin(1-74) Regulate Cardiac Fibroblast Proliferation

Edwin K. Jackson, Eric Mi, Vladimir B. Ritov, and Delbert G. Gillespie

Department of Pharmacology and Chemical Biology

Running title: *Ubiquitin Affects Cardiac Fibroblast Proliferation*

**Address for Correspondence:**

Dr. Edwin K. Jackson  
Department of Pharmacology and Chemical Biology  
100 Technology Drive, Room 514  
University of Pittsburgh School of Medicine Pittsburgh, PA 15219  
Tel: 412-648-1505  
Fax: 412-624-7050  
E-mail: [edj@pitt.edu](mailto:edj@pitt.edu)

# TOF MS Spectrum: Ubiquitin(1-76)

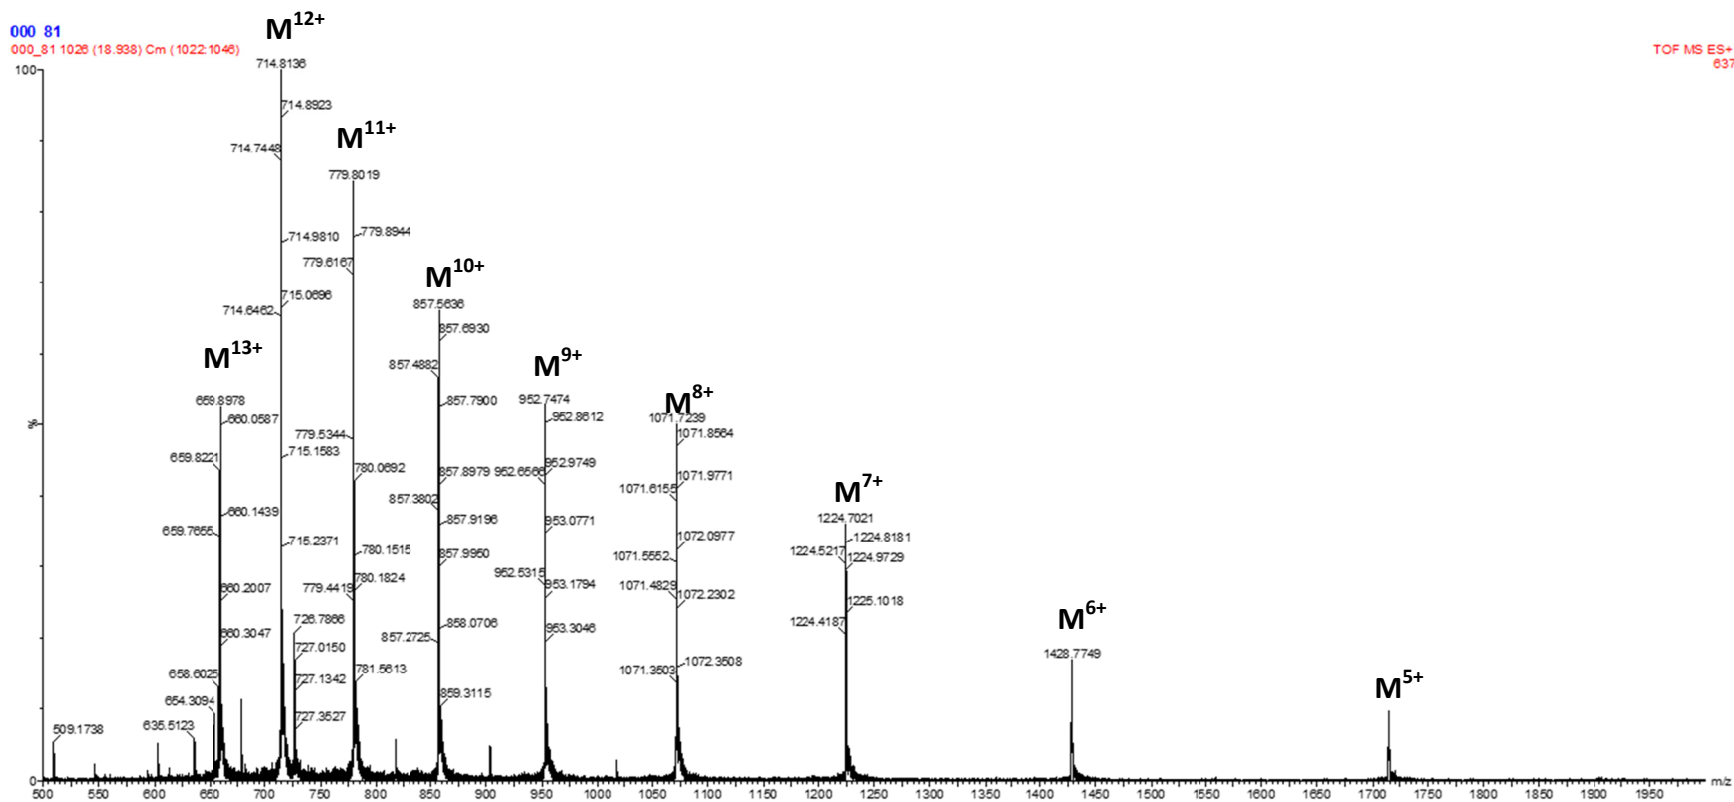

Figure S1

**Figure S1. Time-of-flight (TOF) mass spectrum of authentic ubiquitin(1-76).** This spectrum illustrates with high-mass resolution the signal strength (y-coordinate) for mass-to-charge ( $m/z$ ) ratios (x-coordinate) for different species of ionized ubiquitin(1-76). The different  $m/z$  signals are due to different levels of ionization of ubiquitin(1-76). The number of positive charges on intact ubiquitin(1-76) is given by  $M^{x+}$ , where  $x$  is the number of positive charges. There was no evidence of contamination of the ubiquitin(1-76) with ubiquitin(1-74).

Figure S2

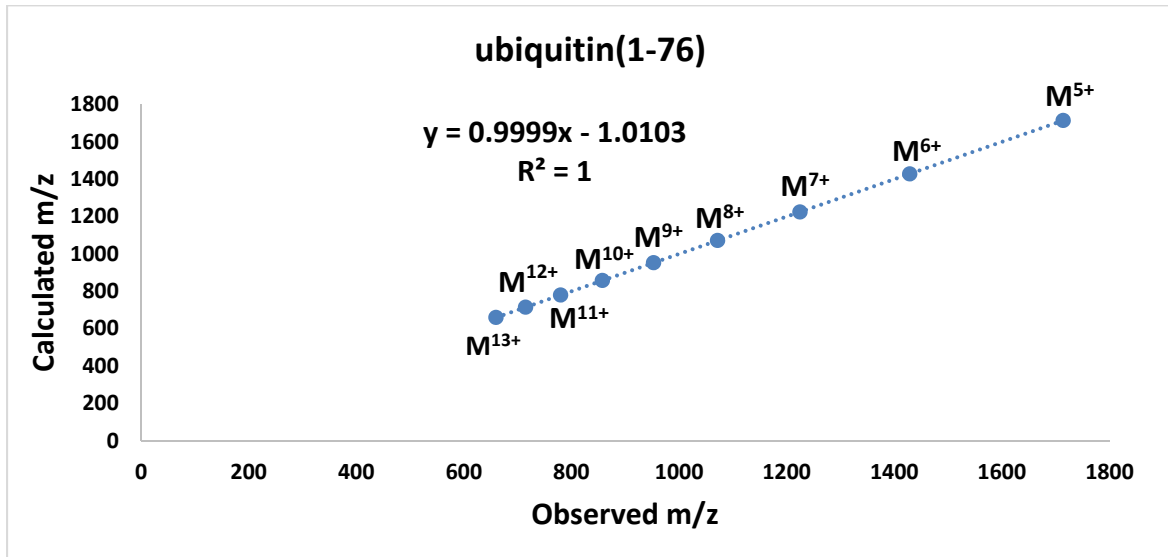

**Figure S2. Plot of calculated versus observed  $M^{x+}$  values for ubiquitin(1-76).** The observed  $m/z$  values for  $M^{5+}$  through  $M^{13+}$  for ubiquitin(1-76) were obtained from the mass spectrum shown in **Figure S6**. These values were plotted against the theoretical values for  $M^{5+}$  through  $M^{13+}$  assuming that the material analyzed was indeed ubiquitin(1-76). The straight-line relationship between observed and theoretical values validate this reagent and confirm the lack of contamination by ubiquitin(1-74).

# TOF MS Spectrum: Ubiquitin(1-74) plus Ubiquitin(1-76) (1:1 ratio)

000\_84

000\_84 1021 (18.847) Cm (1011:1043)

TOF MS ES+  
522

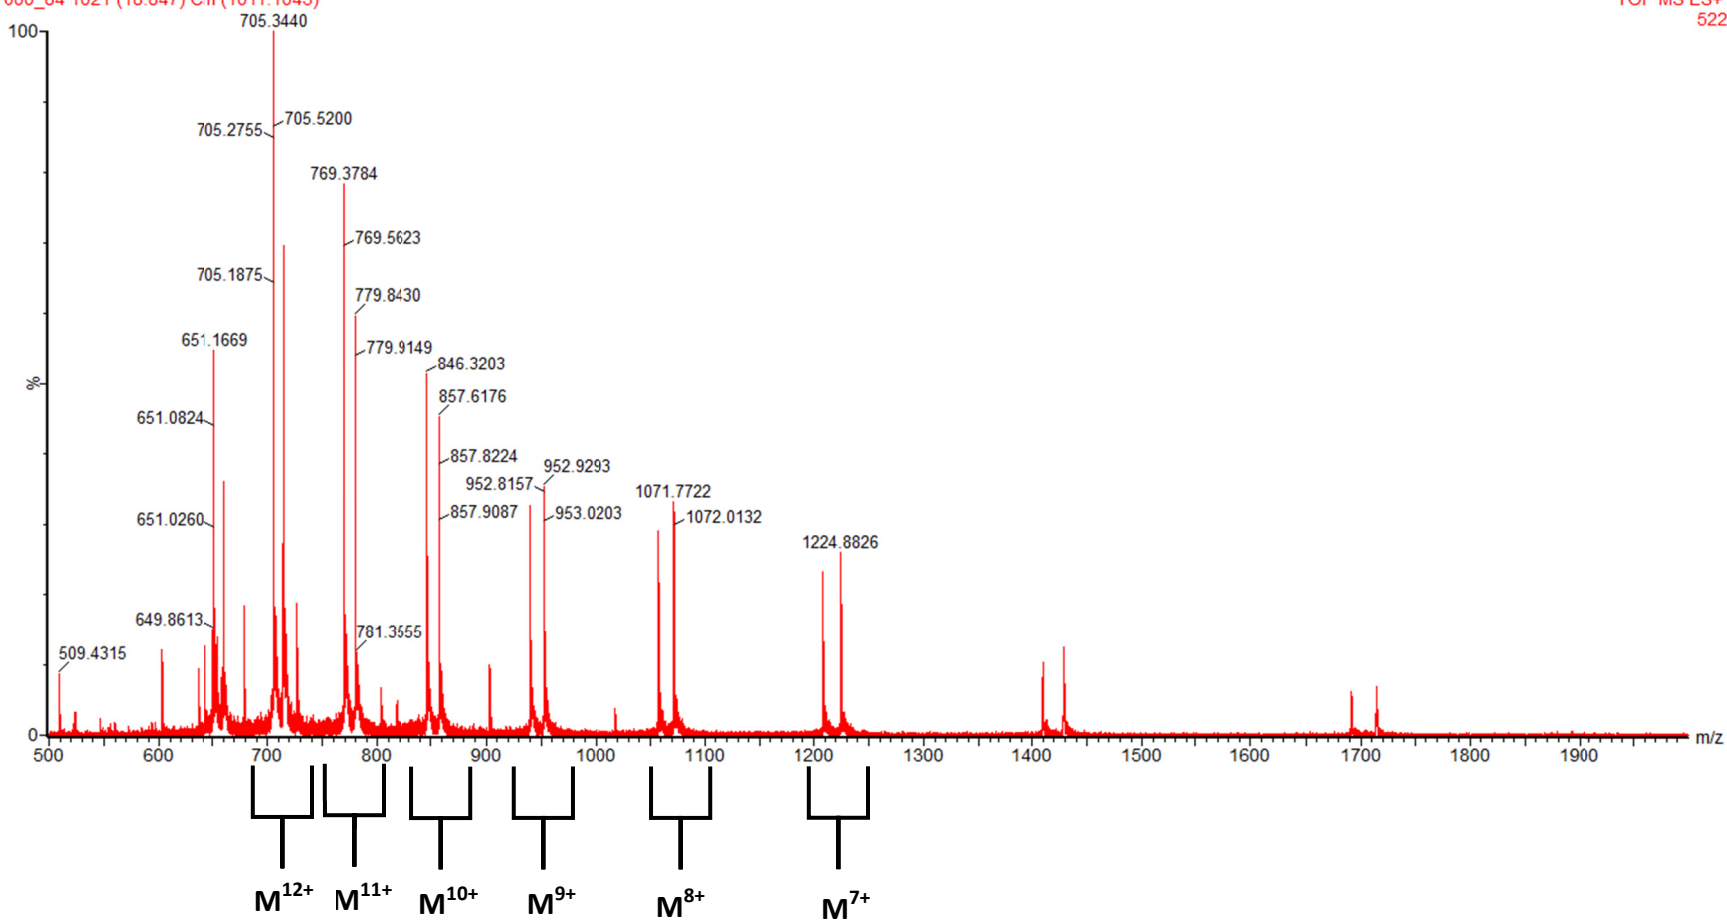

Figure S3

**Figure S3. Time-of-flight (TOF) mass spectrum of a solution of equal concentrations of ubiquitin(1-74) and ubiquitin(1-76).** This spectrum illustrates with high-mass resolution the signal strength (y-coordinate) for mass-to-charge ( $m/z$ ) ratios (x-coordinate) for different species of ionized ubiquitin(1-76) and ubiquitin(1-74). The different  $m/z$  signals are due to different levels of ionization of the peptides (number of positive charges on intact peptides is given by  $M^{x+}$ , where  $x$  is the number of positive charges). Note the pairs of signals that correspond to ubiquitin(1-74) (lower  $m/z$ ) and ubiquitin (1-76) (higher  $m/z$ ).

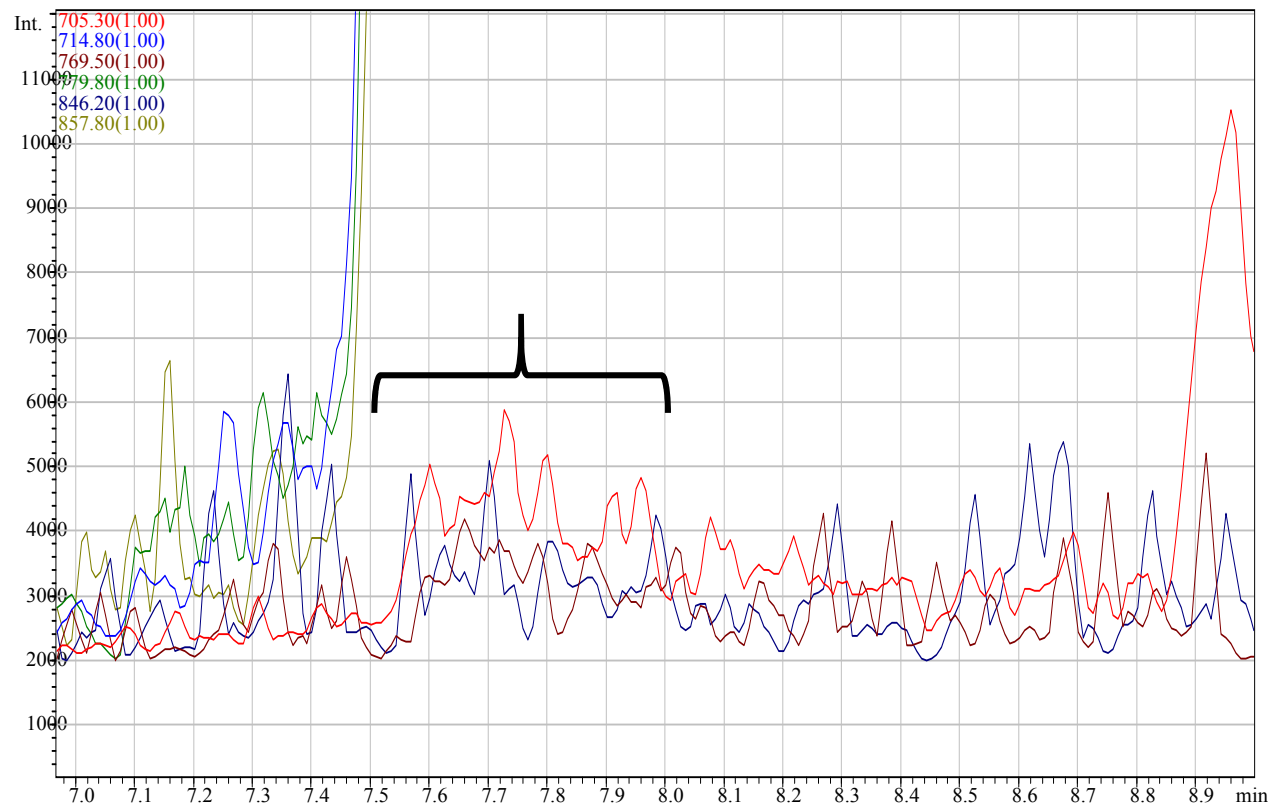

**Figure S4**



**Figure S4. Ubiquitin(1-74) cannot be detected in cardiac fibroblasts co-incubated with ubiquitin(1-76) plus 6bk (an IDE inhibitor).** SHR cardiac fibroblasts were treated with ubiquitin(1-76) (1000 nmol/L) and 6bk (1  $\mu$ mol/L) for 24 hours, and the medium was collected and processed for analysis by mass spectrometry. Samples were loaded onto a polar reverse phase column connected to a Shimadzu HPLC/LCMS-2010 system. Separation was conducted with linear gradient from 20% acetonitrile to 60% acetonitrile in the presence of 0.1% formic acid at flow rate 0.4 ml/min. The mass spectrometer was operated in the positive ion mode with selected ion monitoring. The bracket indicates the retention time of ubiquitin(1-74). The red, brown, and blue lines represent the signal strength for ubiquitin(1-74) ions at 705.30, 769.50 and 846.20 m/z, respectively. The signals for ubiquitin(1-74) were essentially indiscernible from baseline noise.
